# Supplementary material for: Soft lithographic patterning of spin crossover complexes. Part 2: stimuli-responsive diffraction grating properties
Source: Royal Society of Chemistry journal article supplement (doi:10.1039/c2jm15663f), 2012-01-01

## SUPPORTING INFORMATION

# Soft Lithographic Patterning of Spin Crossover Complexes. Part 2: Stimuli-responsive diffraction grating properties

*Amal Akou,<sup>a</sup> Il'ya A. Gural'skiy,<sup>ab</sup> Lionel Salmon,<sup>a</sup> Carlos Bartual-Murgui,<sup>c</sup> Christophe  
Thibault,<sup>c</sup> Christophe Vieu,<sup>c</sup> Gábor Molnár,<sup>\*a</sup> and Azzedine Bousseksou<sup>\*a</sup>*

<sup>a</sup> LCC, CNRS & Université de Toulouse (UPS, INP), 205 route de Narbonne, 31077  
Toulouse, France

<sup>b</sup> Department of Chemistry, National Taras Shevchenko University, 62 Vladimirska str.,  
01601 Kiev, Ukraine

<sup>c</sup> LAAS, CNRS & Université de Toulouse (UPS, INSA, IAES), 7 avenue du colonel Roche,  
31077 Toulouse, France

Optical microscopy and AFM images of  $[\text{Fe}(\text{hptrz})_3](\text{OTs})_2$  surface-relief gratings with various grating geometries. **a:**  $\Lambda_x = 30 \mu\text{m}$ ,  $f = 0.45$ , **b:**  $\Lambda_x = 5 \mu\text{m}$ ,  $f = 0.5$ , **c:**  $\Lambda_{xy} = 10 \mu\text{m}$ ,  $f = 0.45$ , **d:**  $\Lambda_{xy} = 20 \mu\text{m}$ ,  $f = 0.45$ , **e:**  $\Lambda_x = 0.8 \mu\text{m}$ ,  $f = 0.2$ .

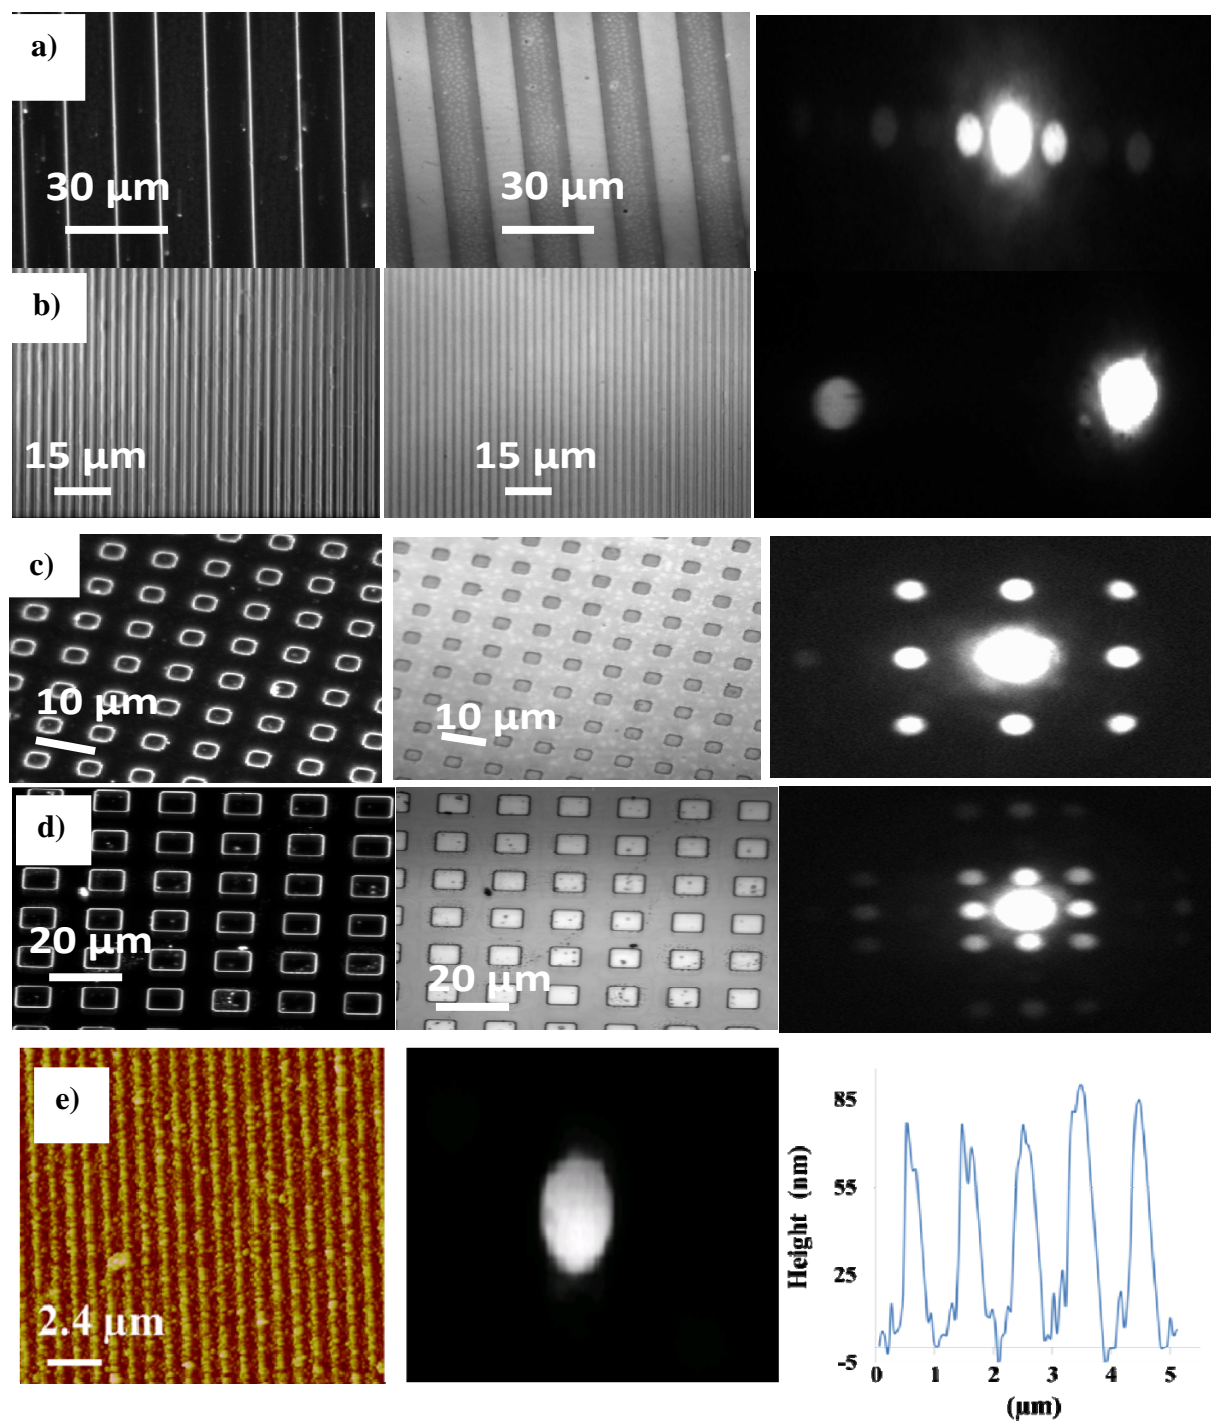

Supplement: c2jm15663f.pdf [file c2jm15663f.pdf]
